# Supplementary material
Source: publisher figshare collection journal article supplement (https://acs.figshare.com/ndownloader/files/5088616)
Supplement: Supplementary file 1 [file 5088616]

 
data_S2 
 
_audit_creation_method            SHELXL-97 
_chemical_name_systematic 
; 
 ? 
; 
_chemical_name_common             ? 
_chemical_melting_point           ? 
_chemical_formula_moiety          'C26 H40 Cl N2 P Pd' 
_chemical_formula_sum 		  'C26 H40 Cl N2 P Pd' 
_chemical_formula_weight          553.44 
 
loop_ 
 _atom_type_symbol 
 _atom_type_description 
 _atom_type_scat_dispersion_real 
 _atom_type_scat_dispersion_imag 
 _atom_type_scat_source 
 'C'  'C'   0.0033   0.0016 
 'International Tables Vol C Tables 4.2.6.8 and 6.1.1.4' 
 'H'  'H'   0.0000   0.0000 
 'International Tables Vol C Tables 4.2.6.8 and 6.1.1.4' 
 'N'  'N'   0.0061   0.0033 
 'International Tables Vol C Tables 4.2.6.8 and 6.1.1.4' 
 'P'  'P'   0.1023   0.0942 
 'International Tables Vol C Tables 4.2.6.8 and 6.1.1.4' 
 'Cl'  'Cl'   0.1484   0.1585 
 'International Tables Vol C Tables 4.2.6.8 and 6.1.1.4' 
 'Pd'  'Pd'  -0.9988   1.0072 
 'International Tables Vol C Tables 4.2.6.8 and 6.1.1.4' 
 
_symmetry_cell_setting            'orthorhombic' 
_symmetry_space_group_name_H-M    'P 21 21 21' 
 
loop_ 
 _symmetry_equiv_pos_as_xyz 
 'x, y, z' 
 '-x+1/2, -y, z+1/2' 
 '-x, y+1/2, -z+1/2' 
 'x+1/2, -y+1/2, -z' 
 
_cell_length_a                    8.9815(6) 
_cell_length_b                    15.1441(11) 
_cell_length_c                    19.2553(14) 
_cell_angle_alpha                 90.00 
_cell_angle_beta                  90.00 
_cell_angle_gamma                 90.00 
_cell_volume                      2619.0(3) 
_cell_formula_units_Z             4 
_cell_measurement_temperature     150(2) 
_cell_measurement_reflns_used     ? 
_cell_measurement_theta_min       ? 
_cell_measurement_theta_max       ? 
_chemical_absolute_configuration  rm
_exptl_crystal_description        ? 
_exptl_crystal_colour             ? 
_exptl_crystal_size_max           0.53 
_exptl_crystal_size_mid           0.35 
_exptl_crystal_size_min           0.29 
_exptl_crystal_density_meas       'not measured' 
_exptl_crystal_density_diffrn     1.404 
_exptl_crystal_density_method     'not measured' 
_exptl_crystal_F_000              1152 
_exptl_absorpt_coefficient_mu     0.888 
_exptl_absorpt_correction_type    empirical 
_exptl_absorpt_correction_T_min   0.6505 
_exptl_absorpt_correction_T_max   0.7829 
_exptl_absorpt_process_details    'Sadabs' 
 
_exptl_special_details 
; 
 ? 
; 
 
_diffrn_ambient_temperature       150(2) 
_diffrn_radiation_wavelength      0.71073 
_diffrn_radiation_type            MoK\a 
_diffrn_radiation_source          'fine-focus sealed tube' 
_diffrn_radiation_monochromator   graphite 
_diffrn_measurement_device_type   'BRUKER APEX' 
_diffrn_measurement_method        'phi and omega scans' 
_diffrn_detector_area_resol_mean  ? 
_diffrn_standards_number          ? 
_diffrn_standards_interval_count  ? 
_diffrn_standards_interval_time   ? 
_diffrn_standards_decay_%         ? 
_diffrn_reflns_number             19890 
_diffrn_reflns_av_R_equivalents   0.0985 
_diffrn_reflns_av_sigmaI/netI     0.0665 
_diffrn_reflns_limit_h_min        -12 
_diffrn_reflns_limit_h_max        7 
_diffrn_reflns_limit_k_min        -20 
_diffrn_reflns_limit_k_max        19 
_diffrn_reflns_limit_l_min        -22 
_diffrn_reflns_limit_l_max        25 
_diffrn_reflns_theta_min          1.71 
_diffrn_reflns_theta_max          28.37 
_reflns_number_total              6532 
_reflns_number_gt                 6283 
_reflns_threshold_expression      >2sigma(I) 
 
_computing_data_collection        ? 
_computing_cell_refinement        ? 
_computing_data_reduction         ? 
_computing_structure_solution     'SHELXS-97 (Sheldrick, 1990)' 
_computing_structure_refinement   'SHELXL-97 (Sheldrick, 1997)' 
_computing_molecular_graphics     ? 
_computing_publication_material   ? 
 
_refine_special_details 
; 
 Refinement of F^2^ against ALL reflections.  The weighted R-factor wR and 
 goodness of fit S are based on F^2^, conventional R-factors R are based 
 on F, with F set to zero for negative F^2^. The threshold expression of 
 F^2^ > 2sigma(F^2^) is used only for calculating R-factors(gt) etc. and is 
 not relevant to the choice of reflections for refinement.  R-factors based 
 on F^2^ are statistically about twice as large as those based on F, and R- 
 factors based on ALL data will be even larger. 
; 
 
_refine_ls_structure_factor_coef  Fsqd  
_refine_ls_matrix_type            full 
_refine_ls_weighting_scheme       calc  
_refine_ls_weighting_details 
 'calc w=1/[\s^2^(Fo^2^)+(0.0394P)^2^+0.0000P] where P=(Fo^2^+2Fc^2^)/3' 
_atom_sites_solution_primary      direct 
_atom_sites_solution_secondary    difmap 
_atom_sites_solution_hydrogens    geom 
_refine_ls_hydrogen_treatment     riding 
_refine_ls_extinction_method      none 
_refine_ls_extinction_coef        ? 
_refine_ls_abs_structure_details 
 'Flack H D (1983), Acta Cryst. A39, 876-881' 
_refine_ls_abs_structure_Flack    -0.06(2) 
_refine_ls_number_reflns          6532 
_refine_ls_number_parameters      280 
_refine_ls_number_restraints      0 
_refine_ls_R_factor_all           0.0356 
_refine_ls_R_factor_gt            0.0342 
_refine_ls_wR_factor_ref          0.0831 
_refine_ls_wR_factor_gt           0.0826 
_refine_ls_goodness_of_fit_ref    1.052 
_refine_ls_restrained_S_all       1.052 
_refine_ls_shift/su_max           0.013 
_refine_ls_shift/su_mean          0.001 
 
loop_ 
 _atom_site_label 
 _atom_site_type_symbol 
 _atom_site_fract_x 
 _atom_site_fract_y 
 _atom_site_fract_z 
 _atom_site_U_iso_or_equiv 
 _atom_site_adp_type 
 _atom_site_occupancy 
 _atom_site_symmetry_multiplicity 
 _atom_site_calc_flag 
 _atom_site_refinement_flags 
 _atom_site_disorder_assembly 
 _atom_site_disorder_group 
Pd1 Pd 0.12607(2) 0.899375(12) 0.139320(10) 0.01590(6) Uani 1 1 d . . . 
Cl1 Cl -0.04411(8) 0.77560(5) 0.14169(5) 0.02970(16) Uani 1 1 d . . . 
P1 P 0.05841(7) 0.95460(4) 0.24630(4) 0.01556(14) Uani 1 1 d . . . 
N1 N 0.2373(3) 0.84507(16) 0.04963(13) 0.0196(5) Uani 1 1 d . . . 
N2 N 0.4803(3) 0.9606(2) 0.37277(18) 0.0422(8) Uani 1 1 d . . . 
C6 C -0.0577(4) 0.8063(2) 0.32089(19) 0.0309(7) Uani 1 1 d . . . 
H6A H -0.0410 0.7620 0.3571 0.046 Uiso 1 1 calc R . . 
H6B H -0.0739 0.7766 0.2763 0.046 Uiso 1 1 calc R . . 
H6C H -0.1456 0.8416 0.3326 0.046 Uiso 1 1 calc R . . 
C20 C 0.3428(3) 1.15120(19) 0.09736(16) 0.0257(6) Uani 1 1 d . . . 
H20A H 0.3218 1.2125 0.1007 0.031 Uiso 1 1 calc R . . 
C18 C 0.2630(3) 0.99794(18) 0.11359(16) 0.0181(5) Uani 1 1 d . . . 
C9 C -0.1331(3) 1.00609(17) 0.24793(16) 0.0220(5) Uani 1 1 d . . . 
C5 C 0.0787(3) 0.86664(18) 0.31561(16) 0.0204(5) Uani 1 1 d . . . 
C26 C 0.5034(3) 1.0317(2) 0.05785(15) 0.0212(6) Uani 1 1 d . . . 
C15 C 0.3964(3) 0.87441(18) 0.05911(15) 0.0199(5) Uani 1 1 d . . . 
H15A H 0.4495 0.8684 0.0137 0.024 Uiso 1 1 calc R . . 
C13 C 0.1761(4) 0.8845(2) -0.01448(16) 0.0284(7) Uani 1 1 d . . . 
H13A H 0.2271 0.8594 -0.0549 0.043 Uiso 1 1 calc R . . 
H13B H 0.1911 0.9486 -0.0135 0.043 Uiso 1 1 calc R . . 
H13C H 0.0693 0.8716 -0.0175 0.043 Uiso 1 1 calc R . . 
C19 C 0.2389(3) 1.09140(18) 0.12012(16) 0.0226(6) Uani 1 1 d . . . 
H19A H 0.1492 1.1122 0.1406 0.027 Uiso 1 1 calc R . . 
C17 C 0.3891(3) 0.97129(17) 0.07796(14) 0.0185(5) Uani 1 1 d . . . 
C8 C 0.2141(3) 0.8110(2) 0.29463(18) 0.0270(6) Uani 1 1 d . . . 
H8A H 0.2297 0.7642 0.3290 0.040 Uiso 1 1 calc R . . 
H8B H 0.3025 0.8488 0.2925 0.040 Uiso 1 1 calc R . . 
H8C H 0.1964 0.7845 0.2490 0.040 Uiso 1 1 calc R . . 
C12 C -0.2518(3) 0.9396(2) 0.2243(2) 0.0307(7) Uani 1 1 d . . . 
H12A H -0.3500 0.9677 0.2252 0.046 Uiso 1 1 calc R . . 
H12B H -0.2516 0.8885 0.2556 0.046 Uiso 1 1 calc R . . 
H12C H -0.2295 0.9199 0.1769 0.046 Uiso 1 1 calc R . . 
C1 C 0.4179(3) 0.9969(2) 0.33029(18) 0.0276(7) Uani 1 1 d . . . 
C4 C 0.1708(3) 1.04781(19) 0.28051(16) 0.0195(5) Uani 1 1 d . . . 
H4A H 0.1355 1.1020 0.2569 0.023 Uiso 1 1 calc R . . 
H4B H 0.1453 1.0543 0.3303 0.023 Uiso 1 1 calc R . . 
C25 C 0.6404(3) 1.0052(2) 0.02681(16) 0.0268(6) Uani 1 1 d . . . 
H25A H 0.6588 0.9442 0.0189 0.032 Uiso 1 1 calc R . . 
C14 C 0.2311(4) 0.74720(19) 0.04120(18) 0.0286(7) Uani 1 1 d . . . 
H14A H 0.2847 0.7302 -0.0010 0.043 Uiso 1 1 calc R . . 
H14B H 0.1270 0.7283 0.0376 0.043 Uiso 1 1 calc R . . 
H14C H 0.2774 0.7188 0.0815 0.043 Uiso 1 1 calc R . . 
C22 C 0.5924(4) 1.1845(2) 0.05010(17) 0.0299(7) Uani 1 1 d . . . 
H22A H 0.5775 1.2457 0.0581 0.036 Uiso 1 1 calc R . . 
C24 C 0.7457(4) 1.0658(3) 0.00828(19) 0.0338(8) Uani 1 1 d . . . 
H24A H 0.8356 1.0469 -0.0130 0.041 Uiso 1 1 calc R . . 
C2 C 0.3432(3) 1.0476(2) 0.27539(16) 0.0223(6) Uani 1 1 d . . . 
H2A H 0.3724 1.0224 0.2294 0.027 Uiso 1 1 calc R . . 
C23 C 0.7217(4) 1.1563(3) 0.02056(18) 0.0340(8) Uani 1 1 d . . . 
H23A H 0.7961 1.1980 0.0082 0.041 Uiso 1 1 calc R . . 
C21 C 0.4799(3) 1.12361(19) 0.06909(15) 0.0226(6) Uani 1 1 d . . . 
C3 C 0.3992(3) 1.1437(2) 0.2793(2) 0.0327(7) Uani 1 1 d . . . 
H3A H 0.5081 1.1445 0.2758 0.049 Uiso 1 1 calc R . . 
H3B H 0.3689 1.1698 0.3237 0.049 Uiso 1 1 calc R . . 
H3C H 0.3563 1.1779 0.2410 0.049 Uiso 1 1 calc R . . 
C11 C -0.1740(3) 1.0436(3) 0.3196(2) 0.0341(8) Uani 1 1 d . . . 
H11A H -0.2738 1.0696 0.3177 0.051 Uiso 1 1 calc R . . 
H11B H -0.1017 1.0892 0.3327 0.051 Uiso 1 1 calc R . . 
H11C H -0.1724 0.9961 0.3541 0.051 Uiso 1 1 calc R . . 
C10 C -0.1322(4) 1.0801(2) 0.1941(2) 0.0352(7) Uani 1 1 d . . . 
H10A H -0.2301 1.1087 0.1930 0.053 Uiso 1 1 calc R . . 
H10B H -0.1099 1.0554 0.1482 0.053 Uiso 1 1 calc R . . 
H10C H -0.0561 1.1237 0.2065 0.053 Uiso 1 1 calc R . . 
C7 C 0.1042(3) 0.9043(2) 0.38893(16) 0.0281(6) Uani 1 1 d . . . 
H7A H 0.1145 0.8557 0.4221 0.042 Uiso 1 1 calc R . . 
H7B H 0.0191 0.9412 0.4021 0.042 Uiso 1 1 calc R . . 
H7C H 0.1951 0.9401 0.3892 0.042 Uiso 1 1 calc R . . 
C16 C 0.4794(3) 0.8208(2) 0.11348(17) 0.0260(6) Uani 1 1 d . . . 
H16A H 0.4825 0.7587 0.0992 0.039 Uiso 1 1 calc R . . 
H16B H 0.4279 0.8257 0.1582 0.039 Uiso 1 1 calc R . . 
H16C H 0.5811 0.8434 0.1181 0.039 Uiso 1 1 calc R . . 
 
loop_ 
 _atom_site_aniso_label 
 _atom_site_aniso_U_11 
 _atom_site_aniso_U_22 
 _atom_site_aniso_U_33 
 _atom_site_aniso_U_23 
 _atom_site_aniso_U_13 
 _atom_site_aniso_U_12 
Pd1 0.01332(9) 0.01444(9) 0.01996(9) -0.00126(8) 0.00039(7) -0.00152(7) 
Cl1 0.0259(3) 0.0247(3) 0.0385(4) -0.0073(3) 0.0066(3) -0.0109(3) 
P1 0.0097(3) 0.0154(3) 0.0216(3) -0.0012(3) 0.0008(3) -0.0016(2) 
N1 0.0201(11) 0.0163(10) 0.0223(11) -0.0017(10) 0.0004(9) -0.0027(9) 
N2 0.0203(13) 0.062(2) 0.0446(18) 0.0045(17) -0.0067(12) -0.0003(13) 
C6 0.0288(15) 0.0240(14) 0.0398(18) 0.0043(15) 0.0051(14) -0.0082(12) 
C20 0.0334(17) 0.0176(13) 0.0262(14) 0.0047(12) -0.0011(12) -0.0024(11) 
C18 0.0190(12) 0.0179(12) 0.0174(11) 0.0029(10) 0.0009(9) -0.0010(9) 
C9 0.0112(11) 0.0225(12) 0.0323(14) -0.0055(12) 0.0014(12) -0.0009(11) 
C5 0.0171(12) 0.0193(12) 0.0247(13) 0.0021(11) 0.0017(10) -0.0017(10) 
C26 0.0174(12) 0.0252(14) 0.0211(13) -0.0010(12) -0.0011(10) -0.0030(10) 
C15 0.0169(13) 0.0195(12) 0.0232(12) -0.0030(11) 0.0005(10) 0.0002(9) 
C13 0.0241(13) 0.0352(18) 0.0258(14) -0.0017(14) -0.0049(11) -0.0007(12) 
C19 0.0220(12) 0.0155(12) 0.0305(14) -0.0004(12) 0.0038(10) 0.0017(10) 
C17 0.0180(12) 0.0188(12) 0.0187(11) 0.0003(10) -0.0011(11) 0.0001(10) 
C8 0.0274(15) 0.0217(14) 0.0318(15) 0.0037(13) -0.0007(12) 0.0062(12) 
C12 0.0134(13) 0.0333(17) 0.046(2) -0.0075(15) -0.0059(12) -0.0020(12) 
C1 0.0122(12) 0.0379(17) 0.0328(16) -0.0056(15) 0.0015(11) -0.0042(11) 
C4 0.0119(11) 0.0202(13) 0.0265(14) -0.0031(12) -0.0010(10) -0.0013(9) 
C25 0.0180(13) 0.0359(16) 0.0264(13) -0.0010(13) 0.0007(12) -0.0018(12) 
C14 0.0306(15) 0.0185(13) 0.0366(17) -0.0118(14) 0.0031(13) -0.0039(11) 
C22 0.0334(18) 0.0268(15) 0.0296(15) 0.0056(14) -0.0052(12) -0.0132(12) 
C24 0.0212(15) 0.051(2) 0.0297(17) 0.0021(16) 0.0033(12) -0.0081(14) 
C2 0.0130(13) 0.0291(14) 0.0249(13) -0.0054(12) 0.0018(10) -0.0041(10) 
C23 0.0302(17) 0.0400(18) 0.0319(17) 0.0105(16) -0.0014(13) -0.0195(15) 
C21 0.0273(14) 0.0210(13) 0.0196(13) 0.0017(11) -0.0022(10) -0.0058(11) 
C3 0.0217(15) 0.0344(17) 0.0419(18) -0.0071(15) 0.0000(13) -0.0129(12) 
C11 0.0151(13) 0.0431(19) 0.0441(19) -0.0176(17) 0.0057(13) 0.0034(12) 
C10 0.0163(12) 0.0359(16) 0.053(2) 0.0127(16) 0.0003(15) 0.0073(13) 
C7 0.0241(14) 0.0374(16) 0.0229(13) 0.0015(14) 0.0035(11) -0.0019(14) 
C16 0.0267(15) 0.0231(14) 0.0282(14) -0.0004(13) -0.0047(12) 0.0045(11) 
 
_geom_special_details 
; 
 All esds (except the esd in the dihedral angle between two l.s. planes) 
 are estimated using the full covariance matrix.  The cell esds are taken 
 into account individually in the estimation of esds in distances, angles 
 and torsion angles; correlations between esds in cell parameters are only 
 used when they are defined by crystal symmetry.  An approximate (isotropic) 
 treatment of cell esds is used for estimating esds involving l.s. planes. 
; 
 
loop_ 
 _geom_bond_atom_site_label_1 
 _geom_bond_atom_site_label_2 
 _geom_bond_distance 
 _geom_bond_site_symmetry_2 
 _geom_bond_publ_flag 
Pd1 C18 1.997(3) . ? 
Pd1 N1 2.158(2) . ? 
Pd1 P1 2.3047(7) . ? 
Pd1 Cl1 2.4191(7) . ? 
P1 C4 1.856(3) . ? 
P1 C9 1.889(3) . ? 
P1 C5 1.894(3) . ? 
N1 C13 1.478(4) . ? 
N1 C14 1.492(4) . ? 
N1 C15 1.507(3) . ? 
N2 C1 1.133(5) . ? 
C6 C5 1.532(4) . ? 
C6 H6A 0.9800 . ? 
C6 H6B 0.9800 . ? 
C6 H6C 0.9800 . ? 
C20 C19 1.372(4) . ? 
C20 C21 1.410(4) . ? 
C20 H20A 0.9500 . ? 
C18 C17 1.384(4) . ? 
C18 C19 1.437(4) . ? 
C9 C10 1.527(4) . ? 
C9 C12 1.536(4) . ? 
C9 C11 1.537(4) . ? 
C5 C8 1.534(4) . ? 
C5 C7 1.540(4) . ? 
C26 C21 1.425(4) . ? 
C26 C25 1.426(4) . ? 
C26 C17 1.428(4) . ? 
C15 C17 1.513(4) . ? 
C15 C16 1.520(4) . ? 
C15 H15A 1.0000 . ? 
C13 H13A 0.9800 . ? 
C13 H13B 0.9800 . ? 
C13 H13C 0.9800 . ? 
C19 H19A 0.9500 . ? 
C8 H8A 0.9800 . ? 
C8 H8B 0.9800 . ? 
C8 H8C 0.9800 . ? 
C12 H12A 0.9800 . ? 
C12 H12B 0.9800 . ? 
C12 H12C 0.9800 . ? 
C1 C2 1.469(5) . ? 
C4 C2 1.552(4) . ? 
C4 H4A 0.9900 . ? 
C4 H4B 0.9900 . ? 
C25 C24 1.366(4) . ? 
C25 H25A 0.9500 . ? 
C14 H14A 0.9800 . ? 
C14 H14B 0.9800 . ? 
C14 H14C 0.9800 . ? 
C22 C23 1.361(5) . ? 
C22 C21 1.416(4) . ? 
C22 H22A 0.9500 . ? 
C24 C23 1.407(6) . ? 
C24 H24A 0.9500 . ? 
C2 C3 1.542(4) . ? 
C2 H2A 1.0000 . ? 
C23 H23A 0.9500 . ? 
C3 H3A 0.9800 . ? 
C3 H3B 0.9800 . ? 
C3 H3C 0.9800 . ? 
C11 H11A 0.9800 . ? 
C11 H11B 0.9800 . ? 
C11 H11C 0.9800 . ? 
C10 H10A 0.9800 . ? 
C10 H10B 0.9800 . ? 
C10 H10C 0.9800 . ? 
C7 H7A 0.9800 . ? 
C7 H7B 0.9800 . ? 
C7 H7C 0.9800 . ? 
C16 H16A 0.9800 . ? 
C16 H16B 0.9800 . ? 
C16 H16C 0.9800 . ? 
 
loop_ 
 _geom_angle_atom_site_label_1 
 _geom_angle_atom_site_label_2 
 _geom_angle_atom_site_label_3 
 _geom_angle 
 _geom_angle_site_symmetry_1 
 _geom_angle_site_symmetry_3 
 _geom_angle_publ_flag 
C18 Pd1 N1 78.52(11) . . ? 
C18 Pd1 P1 96.49(9) . . ? 
N1 Pd1 P1 167.31(7) . . ? 
C18 Pd1 Cl1 166.71(9) . . ? 
N1 Pd1 Cl1 90.71(6) . . ? 
P1 Pd1 Cl1 95.61(3) . . ? 
C4 P1 C9 100.11(12) . . ? 
C4 P1 C5 103.44(13) . . ? 
C9 P1 C5 111.46(13) . . ? 
C4 P1 Pd1 116.72(10) . . ? 
C9 P1 Pd1 113.88(10) . . ? 
C5 P1 Pd1 110.44(9) . . ? 
C13 N1 C14 107.2(2) . . ? 
C13 N1 C15 109.6(2) . . ? 
C14 N1 C15 110.0(2) . . ? 
C13 N1 Pd1 110.01(18) . . ? 
C14 N1 Pd1 116.62(19) . . ? 
C15 N1 Pd1 103.28(17) . . ? 
C5 C6 H6A 109.5 . . ? 
C5 C6 H6B 109.5 . . ? 
H6A C6 H6B 109.5 . . ? 
C5 C6 H6C 109.5 . . ? 
H6A C6 H6C 109.5 . . ? 
H6B C6 H6C 109.5 . . ? 
C19 C20 C21 121.5(3) . . ? 
C19 C20 H20A 119.3 . . ? 
C21 C20 H20A 119.3 . . ? 
C17 C18 C19 117.0(2) . . ? 
C17 C18 Pd1 114.1(2) . . ? 
C19 C18 Pd1 128.4(2) . . ? 
C10 C9 C12 106.5(3) . . ? 
C10 C9 C11 109.8(3) . . ? 
C12 C9 C11 110.1(3) . . ? 
C10 C9 P1 106.66(19) . . ? 
C12 C9 P1 110.87(19) . . ? 
C11 C9 P1 112.6(2) . . ? 
C6 C5 C8 108.9(2) . . ? 
C6 C5 C7 106.2(3) . . ? 
C8 C5 C7 109.1(2) . . ? 
C6 C5 P1 112.9(2) . . ? 
C8 C5 P1 106.1(2) . . ? 
C7 C5 P1 113.5(2) . . ? 
C21 C26 C25 117.8(3) . . ? 
C21 C26 C17 118.5(3) . . ? 
C25 C26 C17 123.7(3) . . ? 
N1 C15 C17 105.9(2) . . ? 
N1 C15 C16 113.0(2) . . ? 
C17 C15 C16 112.0(2) . . ? 
N1 C15 H15A 108.6 . . ? 
C17 C15 H15A 108.6 . . ? 
C16 C15 H15A 108.6 . . ? 
N1 C13 H13A 109.5 . . ? 
N1 C13 H13B 109.5 . . ? 
H13A C13 H13B 109.5 . . ? 
N1 C13 H13C 109.5 . . ? 
H13A C13 H13C 109.5 . . ? 
H13B C13 H13C 109.5 . . ? 
C20 C19 C18 121.3(3) . . ? 
C20 C19 H19A 119.4 . . ? 
C18 C19 H19A 119.4 . . ? 
C18 C17 C26 122.4(3) . . ? 
C18 C17 C15 115.9(2) . . ? 
C26 C17 C15 121.6(2) . . ? 
C5 C8 H8A 109.5 . . ? 
C5 C8 H8B 109.5 . . ? 
H8A C8 H8B 109.5 . . ? 
C5 C8 H8C 109.5 . . ? 
H8A C8 H8C 109.5 . . ? 
H8B C8 H8C 109.5 . . ? 
C9 C12 H12A 109.5 . . ? 
C9 C12 H12B 109.5 . . ? 
H12A C12 H12B 109.5 . . ? 
C9 C12 H12C 109.5 . . ? 
H12A C12 H12C 109.5 . . ? 
H12B C12 H12C 109.5 . . ? 
N2 C1 C2 177.0(3) . . ? 
C2 C4 P1 121.2(2) . . ? 
C2 C4 H4A 107.0 . . ? 
P1 C4 H4A 107.0 . . ? 
C2 C4 H4B 107.0 . . ? 
P1 C4 H4B 107.0 . . ? 
H4A C4 H4B 106.8 . . ? 
C24 C25 C26 121.2(3) . . ? 
C24 C25 H25A 119.4 . . ? 
C26 C25 H25A 119.4 . . ? 
N1 C14 H14A 109.5 . . ? 
N1 C14 H14B 109.5 . . ? 
H14A C14 H14B 109.5 . . ? 
N1 C14 H14C 109.5 . . ? 
H14A C14 H14C 109.5 . . ? 
H14B C14 H14C 109.5 . . ? 
C23 C22 C21 120.9(3) . . ? 
C23 C22 H22A 119.6 . . ? 
C21 C22 H22A 119.6 . . ? 
C25 C24 C23 120.3(3) . . ? 
C25 C24 H24A 119.8 . . ? 
C23 C24 H24A 119.8 . . ? 
C1 C2 C3 108.0(2) . . ? 
C1 C2 C4 114.3(3) . . ? 
C3 C2 C4 108.7(3) . . ? 
C1 C2 H2A 108.6 . . ? 
C3 C2 H2A 108.6 . . ? 
C4 C2 H2A 108.6 . . ? 
C22 C23 C24 120.4(3) . . ? 
C22 C23 H23A 119.8 . . ? 
C24 C23 H23A 119.8 . . ? 
C20 C21 C22 122.0(3) . . ? 
C20 C21 C26 118.5(3) . . ? 
C22 C21 C26 119.4(3) . . ? 
C2 C3 H3A 109.5 . . ? 
C2 C3 H3B 109.5 . . ? 
H3A C3 H3B 109.5 . . ? 
C2 C3 H3C 109.5 . . ? 
H3A C3 H3C 109.5 . . ? 
H3B C3 H3C 109.5 . . ? 
C9 C11 H11A 109.5 . . ? 
C9 C11 H11B 109.5 . . ? 
H11A C11 H11B 109.5 . . ? 
C9 C11 H11C 109.5 . . ? 
H11A C11 H11C 109.5 . . ? 
H11B C11 H11C 109.5 . . ? 
C9 C10 H10A 109.5 . . ? 
C9 C10 H10B 109.5 . . ? 
H10A C10 H10B 109.5 . . ? 
C9 C10 H10C 109.5 . . ? 
H10A C10 H10C 109.5 . . ? 
H10B C10 H10C 109.5 . . ? 
C5 C7 H7A 109.5 . . ? 
C5 C7 H7B 109.5 . . ? 
H7A C7 H7B 109.5 . . ? 
C5 C7 H7C 109.5 . . ? 
H7A C7 H7C 109.5 . . ? 
H7B C7 H7C 109.5 . . ? 
C15 C16 H16A 109.5 . . ? 
C15 C16 H16B 109.5 . . ? 
H16A C16 H16B 109.5 . . ? 
C15 C16 H16C 109.5 . . ? 
H16A C16 H16C 109.5 . . ? 
H16B C16 H16C 109.5 . . ? 
 
loop_ 
 _geom_torsion_atom_site_label_1 
 _geom_torsion_atom_site_label_2 
 _geom_torsion_atom_site_label_3 
 _geom_torsion_atom_site_label_4 
 _geom_torsion 
 _geom_torsion_site_symmetry_1 
 _geom_torsion_site_symmetry_2 
 _geom_torsion_site_symmetry_3 
 _geom_torsion_site_symmetry_4 
 _geom_torsion_publ_flag 
C18 Pd1 P1 C4 -12.55(13) . . . . ? 
N1 Pd1 P1 C4 53.4(3) . . . . ? 
Cl1 Pd1 P1 C4 172.98(10) . . . . ? 
C18 Pd1 P1 C9 103.42(12) . . . . ? 
N1 Pd1 P1 C9 169.4(3) . . . . ? 
Cl1 Pd1 P1 C9 -71.05(10) . . . . ? 
C18 Pd1 P1 C5 -130.28(12) . . . . ? 
N1 Pd1 P1 C5 -64.3(3) . . . . ? 
Cl1 Pd1 P1 C5 55.25(10) . . . . ? 
C18 Pd1 N1 C13 -76.70(19) . . . . ? 
P1 Pd1 N1 C13 -144.5(3) . . . . ? 
Cl1 Pd1 N1 C13 95.45(18) . . . . ? 
C18 Pd1 N1 C14 160.9(2) . . . . ? 
P1 Pd1 N1 C14 93.1(3) . . . . ? 
Cl1 Pd1 N1 C14 -26.9(2) . . . . ? 
C18 Pd1 N1 C15 40.19(17) . . . . ? 
P1 Pd1 N1 C15 -27.7(4) . . . . ? 
Cl1 Pd1 N1 C15 -147.66(16) . . . . ? 
N1 Pd1 C18 C17 -25.8(2) . . . . ? 
P1 Pd1 C18 C17 142.4(2) . . . . ? 
Cl1 Pd1 C18 C17 -62.2(5) . . . . ? 
N1 Pd1 C18 C19 146.3(3) . . . . ? 
P1 Pd1 C18 C19 -45.5(3) . . . . ? 
Cl1 Pd1 C18 C19 109.9(4) . . . . ? 
C4 P1 C9 C10 66.9(2) . . . . ? 
C5 P1 C9 C10 175.8(2) . . . . ? 
Pd1 P1 C9 C10 -58.5(2) . . . . ? 
C4 P1 C9 C12 -177.6(2) . . . . ? 
C5 P1 C9 C12 -68.7(3) . . . . ? 
Pd1 P1 C9 C12 57.1(2) . . . . ? 
C4 P1 C9 C11 -53.7(3) . . . . ? 
C5 P1 C9 C11 55.2(3) . . . . ? 
Pd1 P1 C9 C11 -179.1(2) . . . . ? 
C4 P1 C5 C6 149.9(2) . . . . ? 
C9 P1 C5 C6 43.1(3) . . . . ? 
Pd1 P1 C5 C6 -84.5(2) . . . . ? 
C4 P1 C5 C8 -91.0(2) . . . . ? 
C9 P1 C5 C8 162.30(19) . . . . ? 
Pd1 P1 C5 C8 34.7(2) . . . . ? 
C4 P1 C5 C7 28.8(2) . . . . ? 
C9 P1 C5 C7 -77.9(2) . . . . ? 
Pd1 P1 C5 C7 154.47(17) . . . . ? 
C13 N1 C15 C17 70.7(3) . . . . ? 
C14 N1 C15 C17 -171.6(2) . . . . ? 
Pd1 N1 C15 C17 -46.5(2) . . . . ? 
C13 N1 C15 C16 -166.4(3) . . . . ? 
C14 N1 C15 C16 -48.7(3) . . . . ? 
Pd1 N1 C15 C16 76.4(2) . . . . ? 
C21 C20 C19 C18 -2.5(5) . . . . ? 
C17 C18 C19 C20 -5.6(4) . . . . ? 
Pd1 C18 C19 C20 -177.4(2) . . . . ? 
C19 C18 C17 C26 9.8(4) . . . . ? 
Pd1 C18 C17 C26 -177.1(2) . . . . ? 
C19 C18 C17 C15 -168.1(3) . . . . ? 
Pd1 C18 C17 C15 5.0(3) . . . . ? 
C21 C26 C17 C18 -6.1(4) . . . . ? 
C25 C26 C17 C18 174.1(3) . . . . ? 
C21 C26 C17 C15 171.6(3) . . . . ? 
C25 C26 C17 C15 -8.2(4) . . . . ? 
N1 C15 C17 C18 30.0(3) . . . . ? 
C16 C15 C17 C18 -93.6(3) . . . . ? 
N1 C15 C17 C26 -147.9(3) . . . . ? 
C16 C15 C17 C26 88.5(3) . . . . ? 
C9 P1 C4 C2 -166.9(2) . . . . ? 
C5 P1 C4 C2 78.0(3) . . . . ? 
Pd1 P1 C4 C2 -43.5(3) . . . . ? 
C21 C26 C25 C24 -0.1(5) . . . . ? 
C17 C26 C25 C24 179.7(3) . . . . ? 
C26 C25 C24 C23 1.0(5) . . . . ? 
N2 C1 C2 C3 -20(7) . . . . ? 
N2 C1 C2 C4 -141(7) . . . . ? 
P1 C4 C2 C1 -82.1(3) . . . . ? 
P1 C4 C2 C3 157.2(2) . . . . ? 
C21 C22 C23 C24 0.1(5) . . . . ? 
C25 C24 C23 C22 -0.9(6) . . . . ? 
C19 C20 C21 C22 -175.3(3) . . . . ? 
C19 C20 C21 C26 6.3(4) . . . . ? 
C23 C22 C21 C20 -177.6(3) . . . . ? 
C23 C22 C21 C26 0.8(5) . . . . ? 
C25 C26 C21 C20 177.7(3) . . . . ? 
C17 C26 C21 C20 -2.2(4) . . . . ? 
C25 C26 C21 C22 -0.7(4) . . . . ? 
C17 C26 C21 C22 179.4(3) . . . . ? 
 
_diffrn_measured_fraction_theta_max    0.998 
_diffrn_reflns_theta_full              28.37 
_diffrn_measured_fraction_theta_full   0.998 
_refine_diff_density_max    1.402 
_refine_diff_density_min   -1.445 
_refine_diff_density_rms    0.118 
